# Supplementary material for: The Control of Metabolic CO2 in Public Transport as a Strategy to Reduce the Transmission of Respiratory Infectious Diseases
Source: MDPI journal article supplement (doi:10.3390/ijerph19116605), 2022-05-28
Supplement: s1 [file s1]

# Measurement of metabolic CO<sub>2</sub> in collective transport: a method to reduce the spread of respiratory infectious diseases

Marta Baselga-Lahoz<sup>1</sup>, Juan J. Alba<sup>1,2</sup>, Alberto J. Schuhmacher<sup>1,3</sup>

<sup>1</sup> Institute for Health Research Aragon (IIS Aragón), 50009 Zaragoza, Spain

<sup>2</sup> Department of Mechanical Engineering, University of Zaragoza, Campus Río Ebro – I+D Building, 50018 Zaragoza, Spain

<sup>3</sup> Fundación Agencia Aragonesa para la Investigación y el Desarrollo (ARAID), 500018 Zaragoza, Spain

## Supplementary Material Section

Table S1. Weekend journeys data analysis (from Friday evening to Sunday).

|  | Morning journeys (8:50h – 11:30 h)     |      |      |      |      |      |      |     |      |     |     |      |  |     |
|--|----------------------------------------|------|------|------|------|------|------|-----|------|-----|-----|------|--|-----|
|  | #1                                     | #2   | #3   | #4   | #5   |      |      |     |      |     |     |      |  |     |
|  | Average (ppm)                          | 695  | 771  | 572  | 642  |      |      |     |      |     |     | 708  |  |     |
|  | Standard Deviation (ppm)               | 140  | 196  | 75   | 158  |      |      |     |      |     |     | 191  |  |     |
|  | Maximum (ppm)                          | 929  | 1112 | 701  | 1017 |      |      |     |      |     |     | 1079 |  |     |
|  | Minimum (ppm)                          | 464  | 486  | 464  | 460  |      |      |     |      |     |     | 445  |  |     |
|  | Afternoon journeys (11:31 h – 16:30 h) |      |      |      |      |      |      |     |      |     |     |      |  |     |
|  | #5                                     | #6   | #7   | #8   | #9   | #10  | #11  | #12 | #13  | #14 | #15 |      |  |     |
|  | Average (ppm)                          | 715  | 753  | 641  | 720  | 835  | 790  | 644 | 728  | 634 | 541 |      |  | 595 |
|  | Standard Deviation (ppm)               | 162  | 190  | 153  | 169  | 232  | 235  | 137 | 181  | 152 | 82  |      |  | 116 |
|  | Maximum (ppm)                          | 1011 | 1133 | 1012 | 1011 | 1229 | 1249 | 884 | 1032 | 913 | 704 |      |  | 800 |
|  | Minimum (ppm)                          | 476  | 485  | 465  | 483  | 486  | 475  | 471 | 469  | 444 | 436 |      |  | 445 |
|  | Evening journeys (16:31 h – 20:30 h)   |      |      |      |      |      |      |     |      |     |     |      |  |     |
|  | #16                                    | #17  | #18  | #19  | #20  | #21  | #22  | #23 | #24  |     |     |      |  |     |
|  | Average (ppm)                          | 701  | 685  | 788  | 709  | 680  | 696  | 675 | 674  |     |     | 614  |  |     |
|  | Standard Deviation (ppm)               | 186  | 177  | 237  | 198  | 187  | 250  | 161 | 180  |     |     | 142  |  |     |
|  | Maximum (ppm)                          | 1071 | 999  | 1198 | 1097 | 1059 | 1215 | 955 | 1094 |     |     | 880  |  |     |
|  | Minimum (ppm)                          | 469  | 465  | 469  | 470  | 471  | 454  | 457 | 448  |     |     | 451  |  |     |

Table S2. Weekday journeys data analysis (from Monday to Friday evening).

|                          | Morning journeys (8:50h – 11:30 h)     |      |      |      |     |     |      |  |      |
|--------------------------|----------------------------------------|------|------|------|-----|-----|------|--|------|
|                          | #25                                    | #26  | #27  | #28  | #29 | #30 | #31  |  |      |
| Average (ppm)            | 787                                    | 675  | 647  | 720  | 648 | 662 | 736  |  |      |
| Standard Deviation (ppm) | 227                                    | 162  | 129  | 175  | 159 | 139 | 188  |  |      |
| Maximum (ppm)            | 1159                                   | 993  | 956  | 1030 | 996 | 944 | 1058 |  |      |
| Minimum (ppm)            | 466                                    | 472  | 501  | 499  | 481 | 491 | 479  |  |      |
|                          | Afternoon journeys (11:31 h – 16:30 h) |      |      |      |     |     |      |  |      |
|                          | #32                                    | #33  | #34  | #35  | #36 | #37 | #38  |  | #39  |
| Average (ppm)            | 715                                    | 753  | 720  | 685  | 671 | 629 | 748  |  | 709  |
| Standard Deviation (ppm) | 162                                    | 190  | 175  | 160  | 142 | 147 | 187  |  | 183  |
| Maximum (ppm)            | 1011                                   | 1133 | 1030 | 954  | 996 | 919 | 1121 |  | 1091 |
| Minimum (ppm)            | 476                                    | 485  | 499  | 470  | 471 | 451 | 472  |  | 486  |
|                          | Evening journeys (16:31 h – 20:30 h)   |      |      |      |     |     |      |  |      |
|                          | #40                                    | #41  | #42  | #43  | #44 |     |      |  |      |
| Average (ppm)            | 708                                    | 705  | 604  | 600  | 648 |     |      |  |      |
| Standard Deviation (ppm) | 188                                    | 170  | 97   | 102  | 125 |     |      |  |      |
| Maximum (ppm)            | 1090                                   | 964  | 794  | 805  | 843 |     |      |  |      |
| Minimum (ppm)            | 468                                    | 480  | 475  | 476  | 478 |     |      |  |      |
